# Supplementary material for: Opposite pressure effects in the orbitally-induced Peierls phase transition systems CuIr2S4 and MgTi2O4
Source: Royal Society of Chemistry journal article supplement (doi:10.1039/c7dt00527j), 2017-01-01
Supplement: c7dt00527j1.pdf [file c7dt00527j1.pdf]

# Supplementary material to “Opposite pressure effects in the orbitally-induced Peierls phase transition systems $\text{CuIr}_2\text{S}_4$ and $\text{MgTi}_2\text{O}_4$ ”

Long Ma,<sup>1</sup> Hui Han,<sup>1,2</sup> Wei Liu,<sup>1,2</sup> Kaishuai Yang,<sup>3</sup> Yuanyuan Zhu,<sup>4</sup> Changjin Zhang,<sup>1</sup> Li Pi,<sup>1,5</sup> Dayong Liu,<sup>3,\*</sup> Lei Zhang,<sup>1,†</sup> and Yuheng Zhang<sup>1,5</sup>

<sup>1</sup>*The Anhui Key Laboratory of Condensed Matter Physics at Extreme Conditions, High Magnetic Field Laboratory, Chinese Academy of Sciences, Hefei 230031, China*

<sup>2</sup>*University of Science and Technology of China, Hefei 230026, China*

<sup>3</sup>*Key Laboratory of Materials Physics, Institute of Solid State Physics, Chinese Academy of Sciences, Hefei 230031, China*

<sup>4</sup>*School of Arts and Sciences, Shanxi University of Science and Technology, Xi'an 710021, China*

<sup>5</sup>*Hefei National Laboratory for Physical Sciences at the Microscale, University of Science and Technology of China, Hefei 230026, China*

PACS numbers: 71.30.+h, 71.45.Lr, 72.80.Ga

Keywords: orbitally-induced Peierls instability, pressure effect, metallic-insulating phase transition

---

\*Corresponding author. Email: [dylu@theory.issp.ac.cn](mailto:dylu@theory.issp.ac.cn)

†Corresponding author. Email: [zhanglei@hmf1.ac.cn](mailto:zhanglei@hmf1.ac.cn)

## I. METHOD

In our numerical calculations, the full potential linearized augmented-plane-wave (FP-LAPW) scheme based on density functional theory (DFT) in the WIEN2K package [1] is adopted. Exchange and correlation effects are taken into account in the generalized gradient approximation (GGA) by Perdew, Burk, and Ernzerhof (PBE) [2]. To explore the evolutions of electronic structures with the increase of pressure, we first perform structural relaxation of the crystal structures of  $\text{CuIr}_2\text{S}_4$  and  $\text{MgTi}_2\text{O}_4$  under various pressures through optimizing the total energies of various structures within the framework of DFT. For more clearly revealing the effect of pressure, the electronic structure calculations are performed using 4 GPa.

## II. CRYSTAL STRUCTURES AT PRESSURE

In order to compare our numerical results with the experimental data, we adopt the structural data of  $\text{CuIr}_2\text{S}_4$  [3] and  $\text{MgTi}_2\text{O}_4$  [4] as the initial crystal structures for the structural relaxation. For  $\text{CuIr}_2\text{S}_4$ , the low-temperature phase has a triclinic space group  $P\bar{1}$  (No. 2), the calculated structures at different pressures are listed in Table S I. For  $\text{MgTi}_2\text{O}_4$ , the low-temperature phase has a tetragonal space group  $P4_12_12$  (No. 92), the calculated structures at different pressures are listed in Table S II. The optimized lattice parameters are well consistent with the experimental ones at 0 GPa.

Table S I: The optimized lattice parameters of low-temperature triclinic phase of  $\text{CuIr}_2\text{S}_4$  with  $P\bar{1}$  space group at different pressures.

| P(GPa) | 0( <i>expt.</i> [3]) | 1.0     | 2.0     | 3.0     | 4.0     |
|--------|----------------------|---------|---------|---------|---------|
| a(Å)   | 7.0273(6.988)        | 7.007   | 6.9873  | 6.9686  | 6.9507  |
| b(Å)   | 12.1646(11.956)      | 12.1297 | 12.0959 | 12.0636 | 12.0329 |
| c(Å)   | 12.1654(11.959)      | 12.1303 | 12.0962 | 12.0637 | 12.0333 |

Table S II: The optimized lattice parameters of low-temperature tetragonal phase of  $\text{MgTi}_2\text{O}_4$  with  $P4_12_12$  space group at different pressures.

| P(GPa) | 0( <i>expt.</i> [4]) | 1.0    | 2.0    | 3.0   | 4.0    |
|--------|----------------------|--------|--------|-------|--------|
| a(Å)   | 6.0244(6.022)        | 6.0133 | 6.002  | 5.992 | 5.982  |
| c(Å)   | 8.5123(8.4848)       | 8.4964 | 8.4812 | 8.466 | 8.4512 |

### III. CALCULATED RESULTS

#### A. $\text{CuIr}_2\text{S}_4$

In  $\text{CuIr}_2\text{S}_4$  compound, due to the monovalent Cu ion [5], the Ir ion has an average +3.5 valence. The  $\text{Ir}^{3+/4+}$  ion with  $5d^6/5d^5$  configuration is surrounded by six  $\text{S}^{2-}$  ions, which forms a  $\text{IrS}_6$  octahedron. The octahedral crystal field splits the Ir-5d levels into lower energy triplet  $t_{2g}$  and higher energy doublet  $e_g$  orbitals [6]. With further elongated tetragonal distortion, the on-site energy of the  $xz/yz$  orbitals is lower than that of the  $xy$  orbital.

Figure S 1 shows the total density of states (tDOS) of low-temperature phase of  $\text{CuIr}_2\text{S}_4$  at 0 (solid line) and 4 (dash line) GPa. It is clearly seen that with the increase of pressure, the tDOS around Fermi level decreases, and part of occupied states become unoccupied ones (see the inset of Fig. S 1). Noticed that the physical properties of material are dominantly determined by the electronic properties around Fermi level. Thus the decreased tDOS indicates that the system becomes insulating tendency under high pressure, which results in a decrease of resistivity observed experimentally.

Figure S 2 shows an atomically-resolved density of states of low-temperature phase of  $\text{CuIr}_2\text{S}_4$  at 0 (solid line) and 4 (dash line) GPa. It can be found that the decreased tDOS is mainly contributed from Ir ions. Meanwhile, the contribution of S ions is due to the hybridization between S-3p and Ir-5d orbitals.

In order to understand the influence of pressure on the electronic properties, we plot the Ir-5d orbitally-resolved density of states of low-temperature phase of  $\text{CuIr}_2\text{S}_4$  at 0 (solid line) and 4 (dash line) GPa, as shown in Fig. S 3. It should be noted that in  $\text{CuIr}_2\text{S}_4$ , since the tetragonal distortion is elongated with  $c > a$  ( $a$  ( $x$ ) and  $c$  ( $z$ ) axes are chosen along the Ir-S direction), the pressure effect on the  $z$ -component orbitals is relatively great. As it is

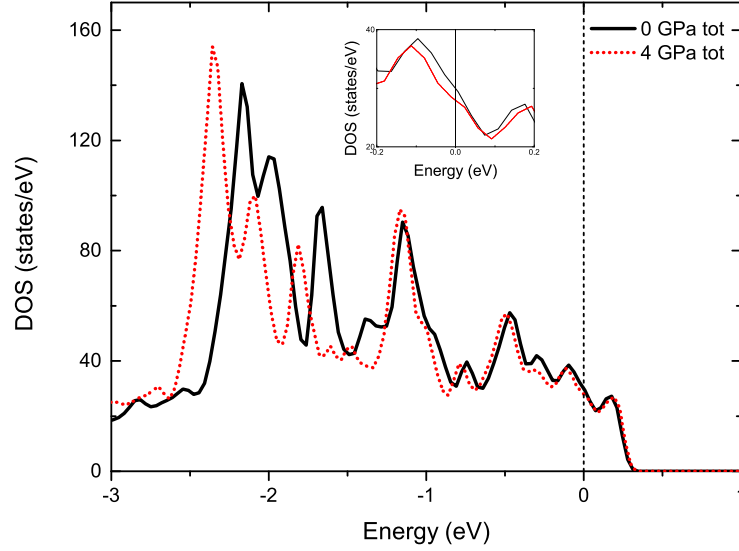

Fig. S 1: (Color online) Total density of states of low-temperature phase of  $\text{CuIr}_2\text{S}_4$  under different pressures. The inset shows the magnification of the corresponding density of states.

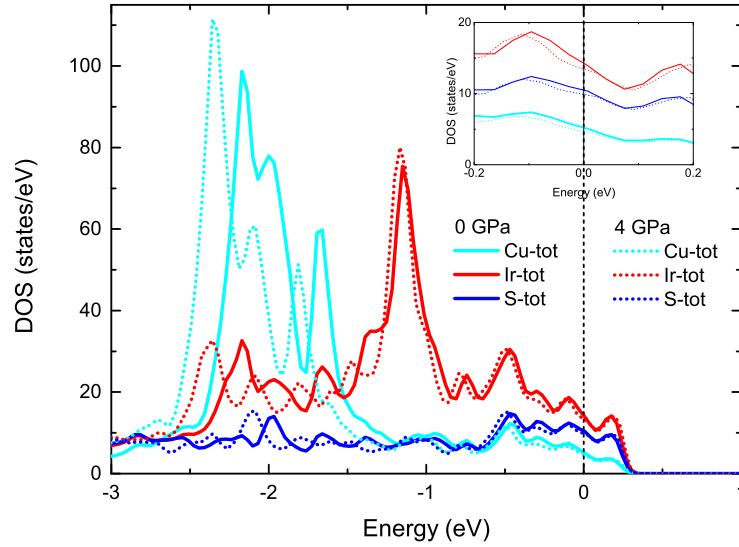

Fig. S 2: (Color online) Atomically-resolved density of states of low-temperature phase of  $\text{CuIr}_2\text{S}_4$  under different pressures. The inset shows the magnification of the corresponding density of states.

expected, we find that the occupation of  $xz$  and  $yz$  orbitals decreases, which dominantly leads to the decrease of tDOS around Fermi level. In fact, the  $xy$  orbital order as suggested by previous study [6] is nearly not affected greatly. That is to say, this  $xy$  orbital order is not melted by the pressure. Thus, the system becomes more insulating tendency.

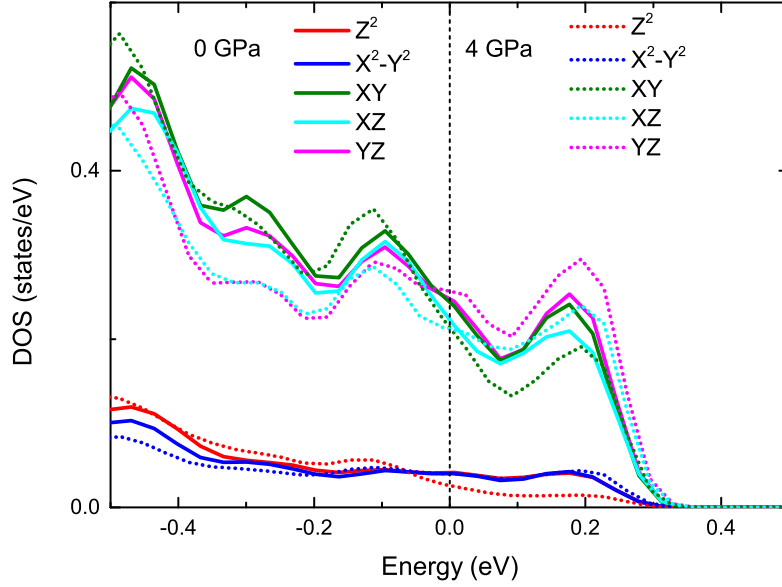

Fig. S 3: (Color online) Ir-5d orbitally-resolved density of states of low-temperature phase of  $\text{CuIr}_2\text{S}_4$  under different pressures.

### B. $\text{MgTi}_2\text{O}_4$

In  $\text{MgTi}_2\text{O}_4$  compound, the  $\text{Ti}^{3+}$  ion with  $3d^1$  configuration is surrounded by six  $\text{O}^{2-}$  ions, which forms a  $\text{TiO}_6$  octahedron. The octahedral crystal field splits the Ti-3d levels into lower energy triplet  $t_{2g}$  and higher energy doublet  $e_g$  orbitals [6]. With further compressed tetragonal distortion, the on-site energy of the  $xy$  orbital is lower than that of the  $xz/yz$  orbitals, in contrast with the case in  $\text{CuIr}_2\text{S}_4$ .

In  $\text{MgTi}_2\text{O}_4$  compound, the pressure behavior is very different from that in  $\text{CuIr}_2\text{S}_4$ . Fig. S 4 shows the tDOS of low-temperature phase of  $\text{MgTi}_2\text{O}_4$  at 0 (solid line) and 4 (dash line) GPa. It is found that the unoccupied states around Fermi level decrease, while the occupied states around Fermi level increase with the increase of pressure. This result is consistent with the increasing tendency of resistivity observed experimentally.

From the atomically-resolved density of states of low-temperature phase of  $\text{MgTi}_2\text{O}_4$  under pressure, as shown in Fig. S 5, we find that the increased tDOS is mainly contributed from the Ti ions. While the contribution from O or Mg is nearly neglected, indicating a rather weak  $p-d$  hybridization between Ti-3d and O-2p orbitals.

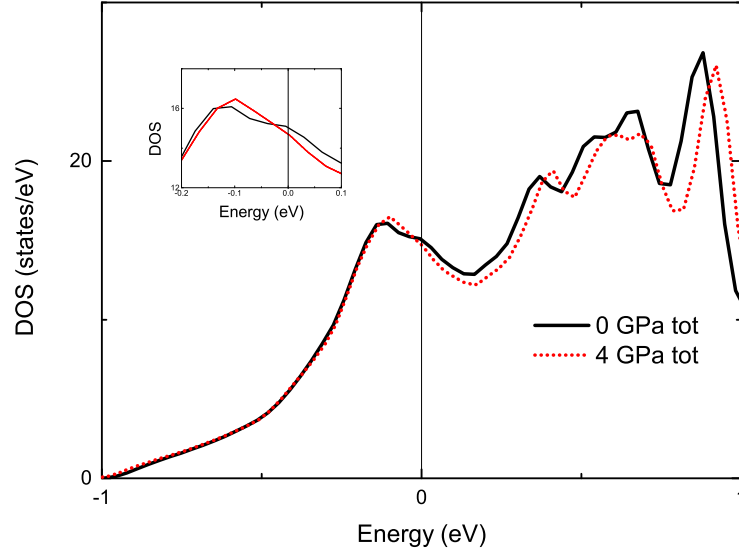

Fig. S 4: (Color online) Total density of states of low-temperature phase of  $\text{MgTi}_2\text{O}_4$  under different pressures. The inset shows the magnification of the corresponding density of states.

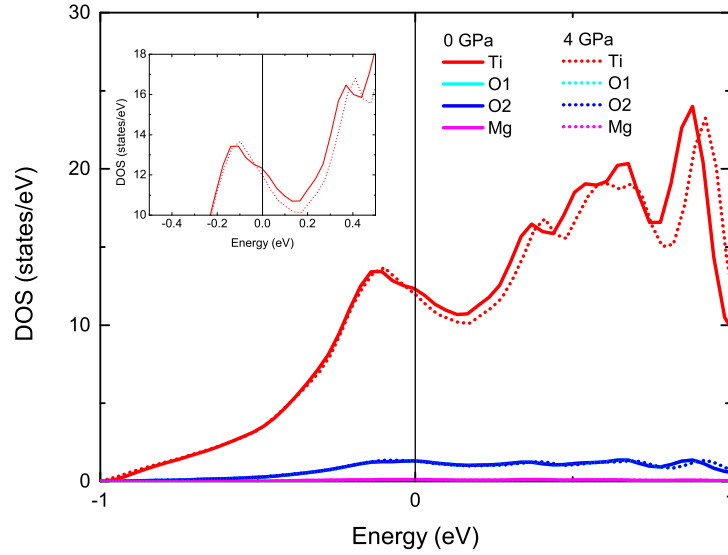

Fig. S 5: (Color online) Atomically-resolved density of states of low-temperature phase of  $\text{MgTi}_2\text{O}_4$  under different pressures. The inset shows the magnification of the corresponding density of states.

Similarly, the Ti-3d orbitally-resolved density of states of low-temperature phase of  $\text{MgTi}_2\text{O}_4$  under pressure are given in Fig. S 6. Noted that in  $\text{MgTi}_2\text{O}_4$ , contrary to  $\text{CuIr}_2\text{S}_4$ , the tetragonal distortion is compressed with  $c < a$  ( $a$  ( $x$ ) and  $c$  ( $z$ ) axes are chosen along the Ti-O direction). The  $x$ - and  $y$ -component orbitals are affected relatively great by pressure. Although the change of  $xy$  orbital occupation is larger than that of  $xz$  and  $yz$  orbitals, all

these three orbitals are changed under pressure, which has a transfer from unoccupied states to occupied states. In fact, the  $xz/yz$  orbital order in  $\text{MgTi}_2\text{O}_4$  is melted by the pressure [6]. Consequently, the melting orbital order results in the metallic tendency with the increase of pressure, as observed experimentally.

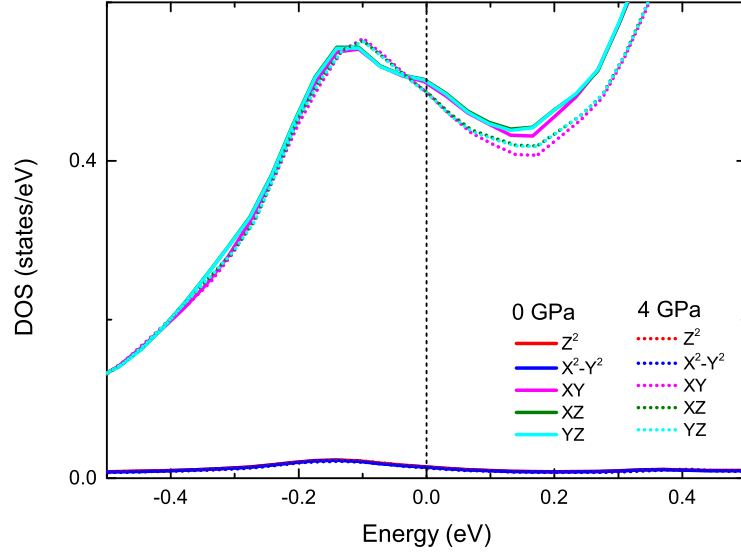

Fig. S 6: (Color online) Ti-3d orbitally-resolved density of states of low-temperature phase of  $\text{MgTi}_2\text{O}_4$  under different pressures.

To summarize, the opposite pressure behaviors in  $\text{CuIr}_2\text{S}_4$  and  $\text{MgTi}_2\text{O}_4$  comes from the different orbital ordering configurations ( $xy$  orbital order, and  $xz/yz$  orbital order) due to the different tetragonal lattice distortions (elongation and compression of the  $c$ -axis) in these two compounds.

- 
- [1] P. Blaha, K. Schwarz, G. Madsen, D. Kvasnicka, and J. Luitz: "Computer Code WIEN2k, an augmented plane wave plus local orbitals program for calculating crystal properties", Karlheinz Schwarz, Technische Universität Wien, Austria, (2001).
  - [2] J. P. Perdew, K. Burke, and M. Ernzerhof, Phys. Rev. Lett. **77**, 3865 (1996).
  - [3] P. G. Radaelli, Y. Horibe, M. J. Gutmann, H. Ishibashi, C. H. Chen, R. M. Ibberson, Y. Koyama, Y. S. Hor, V. Kiryukhin, and S. W. Cheong, Nature **416**, 155 (2002).
  - [4] M. Schmidt, W. Ratcliff II, P. G. Radaelli, K. Refson, N. M. Harrison, and S.W. Cheong, Phys. Rev. Lett. **92**, 056402 (2004).

- [5] J. Matsuno, T. Mizokawa, A. Fujimori, D. A. Zatsepin, V. R. Galakhov, E. Z. Kurmaev, Y. Kato, and S. Nagata, Phys. Rev. B **55**, R15979 (1997).
- [6] D. I. Khomskii, and T. Mizokawa, Phys. Rev. Lett. **94**, 156402 (2005).
